# Supplementary material for: Synthesis, structure, and characterization of a series of Ag(i), Cu(ii) and Ni(ii) complexes based on 2,5-dimethyl-1,3,4-thiodiazole
Source: Royal Society of Chemistry journal article supplement (doi:10.1039/c3ce40672e), 2013-01-01
Supplement: c3ce40672e.pdf [file c3ce40672e.pdf]

## Supporting Information

|               |           |             |           |                 |              |                        |                        |
|---------------|-----------|-------------|-----------|-----------------|--------------|------------------------|------------------------|
| Sample Name   | LC/MS     | Position    | P1-A1     | Instrument Name | Instrument 1 | User Name              |                        |
| Inj Vol       | 3         | InjPosition |           | SampleType      | Sample       | IRM Calibration Status | Some Ions Missed       |
| Data Filename | 1210288.d | ACQ Method  | chen-ms.m | Comment         |              | Acquired Time          | 12/25/2012 10:56:34 AM |

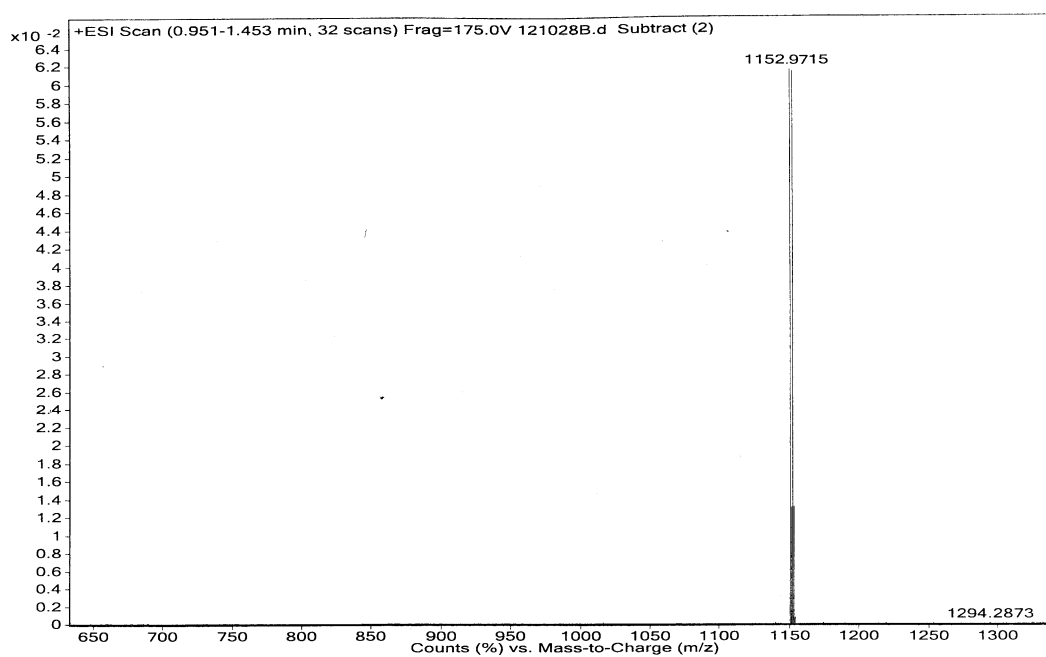

Figure S1. The mass spectrum (MS) of 1.

|               |          |             |           |                 |              |                        |                        |
|---------------|----------|-------------|-----------|-----------------|--------------|------------------------|------------------------|
| Sample Name   | LC/MS    | Position    | P1-A3     | Instrument Name | Instrument 1 | User Name              |                        |
| Inj Vol       | 3        | InjPosition |           | SampleType      | Sample       | IRM Calibration Status | Some Ions Missed       |
| Data Filename | 101231.d | ACQ Method  | chen-ms.m | Comment         |              | Acquired Time          | 12/25/2012 11:04:12 AM |

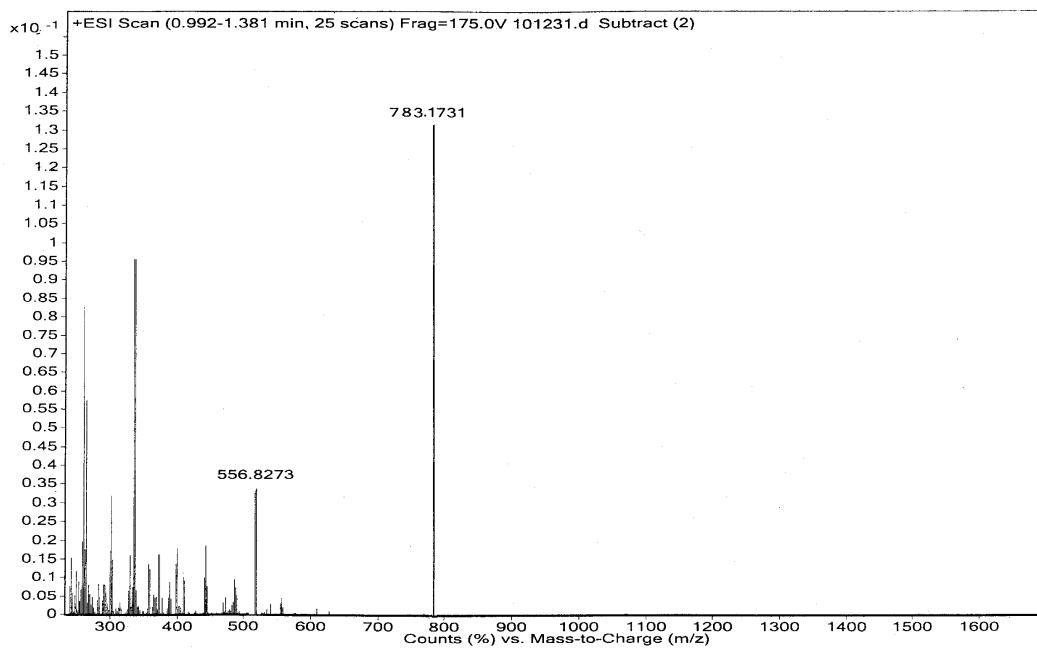

Figure S2. The mass spectrum (MS) of 2.

|               |          |             |           |                 |              |                        |                        |
|---------------|----------|-------------|-----------|-----------------|--------------|------------------------|------------------------|
| Sample Name   | LC/MS    | Position    | P1-A2     | Instrument Name | Instrument 1 | User Name              |                        |
| Inj Vol       | 3        | InjPosition |           | SampleType      | Sample       | IRM Calibration Status | Some Ions Missed       |
| Data Filename | 101216.d | ACQ Method  | chen-ms.m | Comment         |              | Acquired Time          | 12/25/2012 11:00:24 AM |

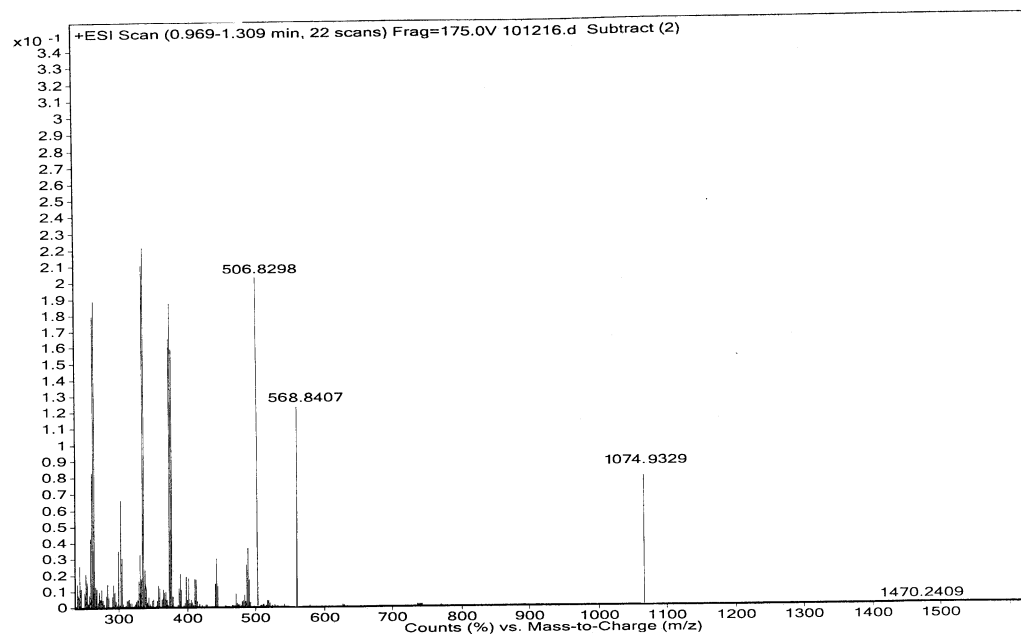

Figure S3. The mass spectrum (MS) of 4.
